# Supplementary material for: Unraveling the Li+ desorption behavior and mechanism of Li4Ti5O12 with different facets to enhance lithium extraction
Source: Royal Society of Chemistry journal article supplement (doi:10.1039/d2ta10016a), 2023-01-01
Supplement: d2ta10016a1.pdf [file d2ta10016a1.pdf]

## **Unraveling the Li<sup>+</sup> desorption behavior and mechanism of Li<sub>4</sub>Ti<sub>5</sub>O<sub>12</sub> with different facets to enhance lithium extraction**

Bing Zhao<sup>a, b</sup>, Yingjun Qiao<sup>a</sup>, Zhiqiang Qian<sup>a</sup>, Wenfei Wei<sup>\*a</sup>, Jun Li<sup>a</sup>, Zhijian Wu<sup>a</sup> and Zhong Liu<sup>\*a</sup>

<sup>a</sup> Key Laboratory of Comprehensive and Highly Efficient Utilization of Salt Lake Resources, Qinghai Provincial Key

Laboratory of Resources and Chemistry of Salt Lakes, Qinghai Institute of Salt Lakes, Chinese Academy of

Sciences, Xining, Qinghai 810008, China

<sup>b</sup> University of Chinese Academy of Sciences, Beijing 100049, China

\*Corresponding author, E-mail address: weiwf@isl.ac.cn; liuzhong@isl.ac.cn

---

# 1 Experiments and calculation methods

## 1.1 Data processing

The adsorption and desorption properties were evaluated by adsorption capacity ( $q_e$ ), desorption efficiency ( $\partial$ ), distribution coefficient ( $K_d$ ), and separation factor ( $a_{Me}^{Li}$ ), respectively. They were calculated using the following equations:

$$q_e = \frac{(C_0 - C_e)V_1}{m} \quad (1)$$

$$\partial = \frac{C_t V_2}{s} \quad (2)$$

$$K_d = \frac{(C_0 - C_e) \cdot 1000 \cdot V_1}{C_e \cdot m_1} \quad (3)$$

$$a_{Me}^{Li} = \frac{K_d(Li)}{K_d(Me)} \quad (Me = Na, K, Rb, Cs) \quad (4)$$

where  $C_0$  and  $C_e$  (mg/L) are the initial and equilibrium concentrations of  $Li^+$ ;  $C_t$  (mg/L) represents the concentration of  $Li^+$  at some times;  $V_1$  and  $V_2$  (L) are the volumes of the LiCl solution and the desorption solution;  $m$  (g) and  $s$  (mg) denote the amounts of the adsorbent and  $Li^+/Ti^{4+}$  in the adsorbent, respectively.

## 1.2 Model fitting

The dates of adsorption isotherms were fitted by the Langmuir, Freundlich models and these equations can be depicted in Eq. (5) and Eq. (6).

$$\text{Langmuir model: } \frac{C_e}{q_e} = \frac{1}{q_m b} + \frac{C_e}{q_m} \quad (5)$$

$$\text{Freundlich model: } \ln q_e = \ln K_F + \frac{1}{n} \ln C_e \quad (6)$$

where  $C_e$  is the equilibrium concentration (mg/L).  $b$  is the adsorption intensity or Langmuir coefficient related to the affinity of the binding site (L/mg).  $K_F$  and  $1/n$  are the constants that are related to the adsorption capacity and the adsorption intensity, respectively.

Meanwhile, the  $Li^+$  adsorption activities on HTO-s were explained by the pseudo-first-order (Eq. (7)) and pseudo-second-order (Eq. (8)) models, these equations were written as:

Pseudo-first-order:  $q_t = q_e(1 - e^{-K_1 t})$  (7)

Pseudo-second-order:  $q_t = \frac{K_2 q_e^2 t}{1 + K_2 q_e t}$  (8)

Intra-particle diffusion model:  $q_t = K_{dif} t^{0.5} + C$  (9)

where  $q_e$  and  $q_t$  (mg/g) are the amounts of cesium ions absorbed at equilibrium and at time  $t$ ; and  $K_1$  ( $\text{min}^{-1}$ ) and  $K_2$  (g/mg/min) denote the pseudo-first-order and pseudo-second-order constants.  $K_{dif}$  is the intra-particle diffusion rate constant ( $\text{mg/g}/\text{min}^{1/2}$ ).

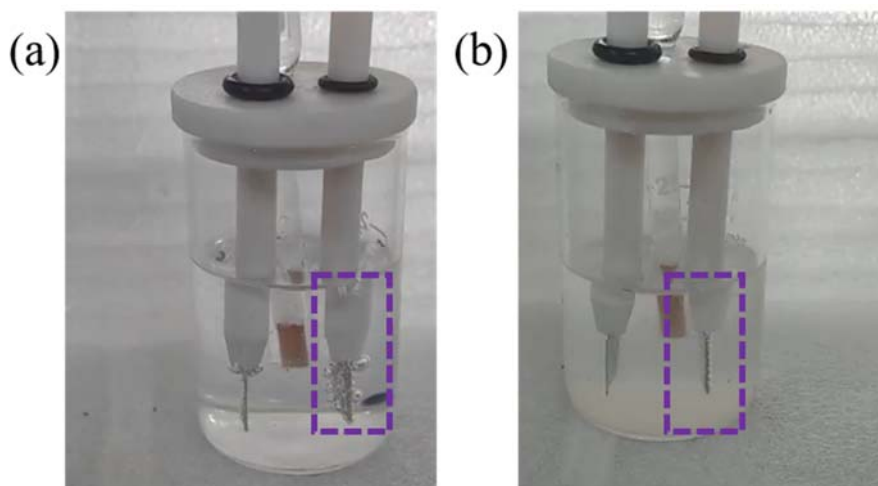

**Fig. S1.** The pictures of different solutions recorded during the LSV process: (c) before desorption (pure HCl solutions) and after desorption (desorption time: 24 h).

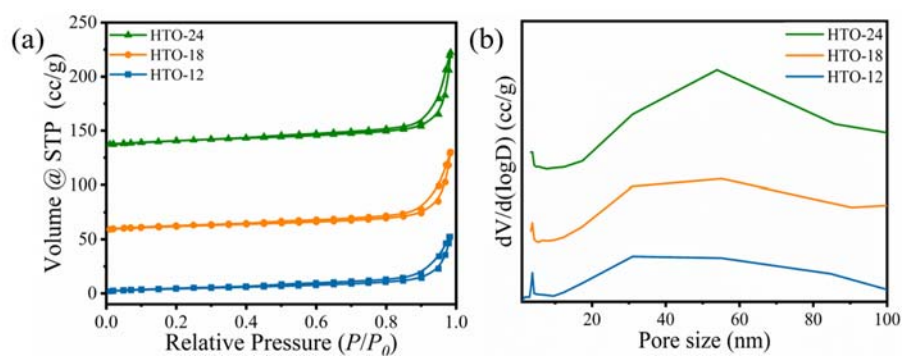

**Fig. S2.** The (a)  $N_2$  ad-desorption isotherms and (b) pore distributions of HTO-s.

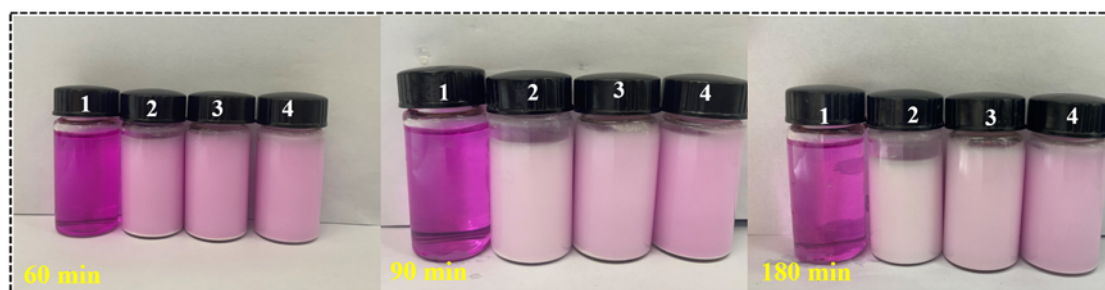

**Fig. S3.** Visualization adsorption experiments with adding different adsorbents (1: without adsorbent, 2: HTO-12, 3: HTO-18, 4: HTO-24) with different adsorption times.

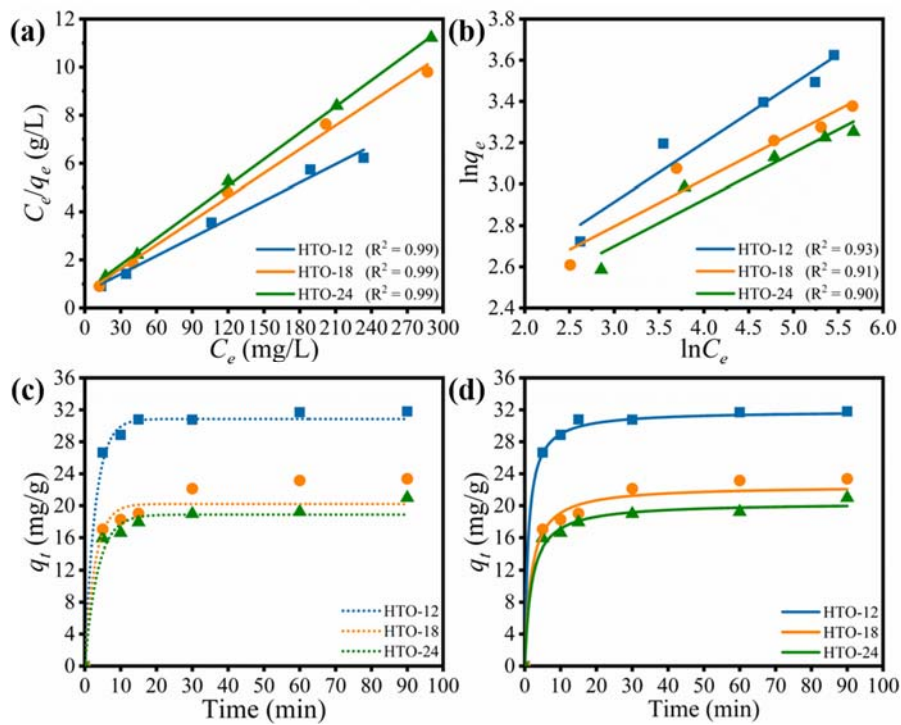

**Fig. S4.** The adsorption curves were fitted by different models: (a) Langmuir, (b) Freundlich, (c) pseudo-first-order and (d) pseudo-second-order models.

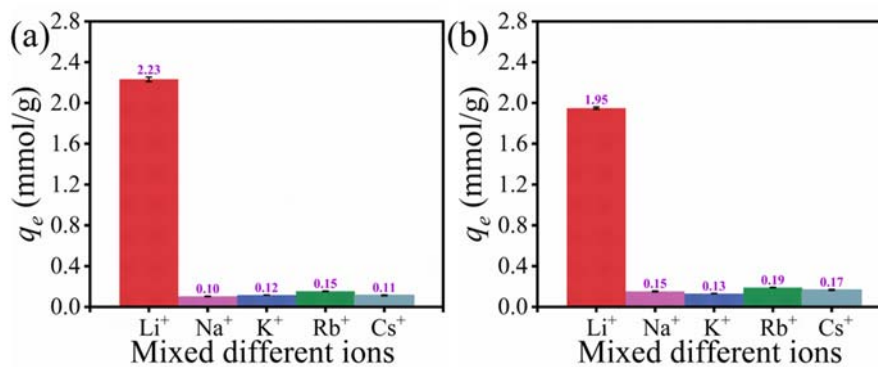

**Fig. S5.** The adsorption selectivity of  $\text{Li}^+$  by HTO-s: (a) HTO-18 and (b) HTO-24.

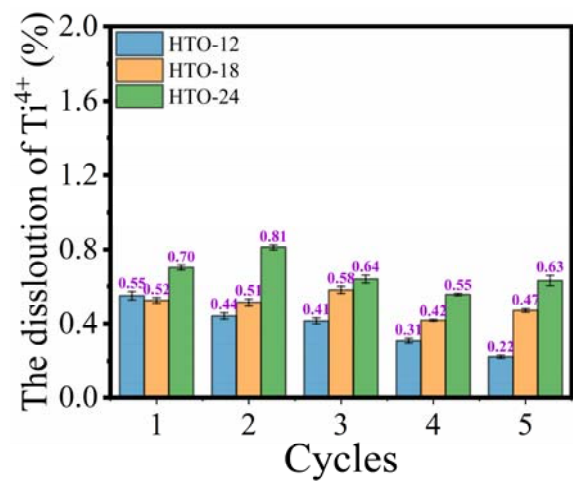

Fig. S6. The dissolution loss of  $Ti^{4+}$  in each cycle by HTO-s.

**Table S1.** The Intra-particle diffusion fitting parameters of Li<sup>+</sup> extraction during the desorption process.

| T      | Intra-particle diffusion            |                |                                     |                |                                     |                |
|--------|-------------------------------------|----------------|-------------------------------------|----------------|-------------------------------------|----------------|
|        | $K_1$<br>(mg/g·min <sup>0.5</sup> ) | R <sup>2</sup> | $K_2$<br>(mg/g·min <sup>0.5</sup> ) | R <sup>2</sup> | $K_3$<br>(mg/g·min <sup>0.5</sup> ) | R <sup>2</sup> |
| HTO-12 | 1.44                                | 0.96           | 0.28                                | 0.64           | 0.03                                | 0.91           |
| HTO-18 | 0.95                                | 0.98           | 0.51                                | 0.95           | 0.01                                | 0.47           |
| HTO-24 | 1.34                                | 0.99           | 0.93                                | 0.70           | 0.03                                | 0.75           |

**Table S2.** The Intra-particle diffusion model fitting parameters of Ti<sup>4+</sup> dissolution during the desorption process.

| T      | Intra-particle diffusion            |                |                                     |                |
|--------|-------------------------------------|----------------|-------------------------------------|----------------|
|        | $K_1$<br>(mg/g·min <sup>0.5</sup> ) | R <sup>2</sup> | $K_2$<br>(mg/g·min <sup>0.5</sup> ) | R <sup>2</sup> |
| HTO-12 | 1.54                                | 0.99           | 0.35                                | 1.00           |
| HTO-18 | 1.06                                | 0.97           | 0.67                                | 1.00           |
| HTO-24 | 0.91                                | 0.97           | 0.75                                | 1.00           |

**Table S3.** The Langmuir and Freundlich models fitting parameters of HTO-s towards Li<sup>+</sup> adsorption.

| T      | Langmuir model  |               |                | Freundlich model                     |      |                |
|--------|-----------------|---------------|----------------|--------------------------------------|------|----------------|
|        | $q_m$<br>(mg/g) | $b$<br>(L/mg) | R <sup>2</sup> | $K_F$<br>(mg/g)(L/mg) <sup>1/n</sup> | 1/n  | R <sup>2</sup> |
| HTO-12 | 39.54           | 60.86         | 0.99           | 7.81                                 | 0.29 | 0.93           |
| HTO-18 | 30.32           | 47.10         | 0.99           | 8.32                                 | 0.23 | 0.91           |
| HTO-24 | 27.44           | 38.96         | 0.99           | 7.56                                 | 0.23 | 0.90           |

**Table S4.** The Intra-particle diffusion fitting parameters of HTO-s towards Li<sup>+</sup> adsorption in 249.88 mg/L LiCl solutions at 45°C.

| T      | Intra-particle diffusion            |                |                                     |                |                                     |                |
|--------|-------------------------------------|----------------|-------------------------------------|----------------|-------------------------------------|----------------|
|        | $K_1$<br>(mg/g·min <sup>0.5</sup> ) | R <sup>2</sup> | $K_2$<br>(mg/g·min <sup>0.5</sup> ) | R <sup>2</sup> | $K_3$<br>(mg/g·min <sup>0.5</sup> ) | R <sup>2</sup> |
| HTO-12 | 2.55                                | 0.99           | 0.27                                | 0.93           | 0.01                                | 1.00           |
| HTO-18 | 1.26                                | 0.99           | 0.65                                | 0.85           | 0.04                                | 1.00           |
| HTO-24 | 1.20                                | 0.86           | 0.50                                | 0.97           | 0.02                                | 1.00           |

**Table S5.** The fitting parameters of adsorption kinetics by Pseudo-first-order and Pseudo-second-order models.

| 249.88 mg/L<br>LiCl | Pseudo-first-order    |                       |       |                | Pseudo-second-order       |       |                |
|---------------------|-----------------------|-----------------------|-------|----------------|---------------------------|-------|----------------|
|                     | $q_{e,exp}$<br>(mg/g) | $q_{e,cal}$<br>(mg/g) | $K_1$ | R <sup>2</sup> | $q_{e,cal}$<br>(g/mg/min) | $K_2$ | R <sup>2</sup> |
| HTO-12              | 31.80                 | 30.86                 | 0.35  | 0.93           | 31.88                     | 0.03  | 0.90           |
| HTO-18              | 23.37                 | 20.22                 | 0.35  | 0.50           | 22.50                     | 0.02  | 0.83           |
| HTO-24              | 20.99                 | 18.88                 | 0.27  | 0.56           | 20.38                     | 0.03  | 0.87           |

**Table S6.** Adsorption selectivity by HTO-s in solutions containing Li<sup>+</sup>, Na<sup>+</sup>, K<sup>+</sup>, Rb<sup>+</sup>, Cs<sup>+</sup>.

| Metal<br>ions   | HTO-12            |                 |                 | HTO-18            |                 |                 | HTO-24            |                 |                 |
|-----------------|-------------------|-----------------|-----------------|-------------------|-----------------|-----------------|-------------------|-----------------|-----------------|
|                 | $q_e$<br>(mmol/g) | $K_d$<br>(mL/g) | $\alpha_M^{Li}$ | $q_e$<br>(mmol/g) | $K_d$<br>(mL/g) | $\alpha_M^{Li}$ | $q_e$<br>(mmol/g) | $K_d$<br>(mL/g) | $\alpha_M^{Li}$ |
| Li <sup>+</sup> | 3.06              | 729.04          | 1.00            | 2.23              | 484.48          | 1.00            | 1.95              | 410.49          | 1.00            |
| Na <sup>+</sup> | 0.11              | 27.86           | 26.16           | 0.10              | 26.49           | 18.29           | 0.15              | 39.21           | 10.47           |
| K <sup>+</sup>  | 0.12              | 7.90            | 92.29           | 0.12              | 7.83            | 61.88           | 0.13              | 8.61            | 47.70           |
| Rb <sup>+</sup> | 0.15              | 16.18           | 45.06           | 0.15              | 16.77           | 28.88           | 0.19              | 20.65           | 19.87           |
| Cs <sup>+</sup> | 0.09              | 22.35           | 32.63           | 0.11              | 27.16           | 17.84           | 0.17              | 41.50           | 9.89            |
